# Supplementary material for: Biofunctionalization of zirconia with cell-adhesion peptides via polydopamine crosslinking for soft tissue engineering: effects on the biological behaviors of human gingival fibroblasts and oral bacteria
Source: Royal Society of Chemistry journal article supplement (doi:10.1039/c9ra08575k), 2020-01-01
Supplement: c9ra08575k1.pdf [file c9ra08575k1.pdf]

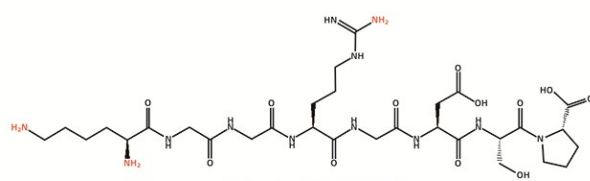

KGGRGDSP

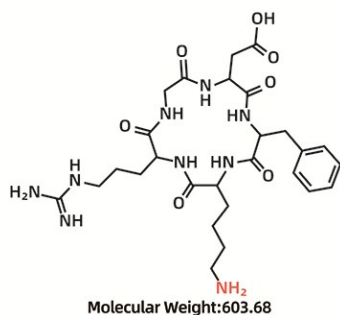

c(RGDfK)

Supplementary Fig. 1. Chemical structure formulae of RGD peptides. The functional amino groups were marked red. The molecular weights of KGGRGDSP and c(RGDfK) are 772.82 and 603.68, respectively.
